# Supplementary material for: Effect of Applied Pressure on the Electrical Resistance of Carbon Nanotube Fibers
Source: MDPI journal article supplement (doi:10.3390/ma14092106), 2021-04-21
Supplement: s1 [file s1]

# Effect of Applied Pressure on the Electrical Resistance of Carbon Nanotube Fibers

Chris J. Barnett, James D. McGettrick, Varun Shenoy Gangoli, Ewa Kazimierska, Alvin Orbaek White and Andrew R. Barron

## Supplemental Information

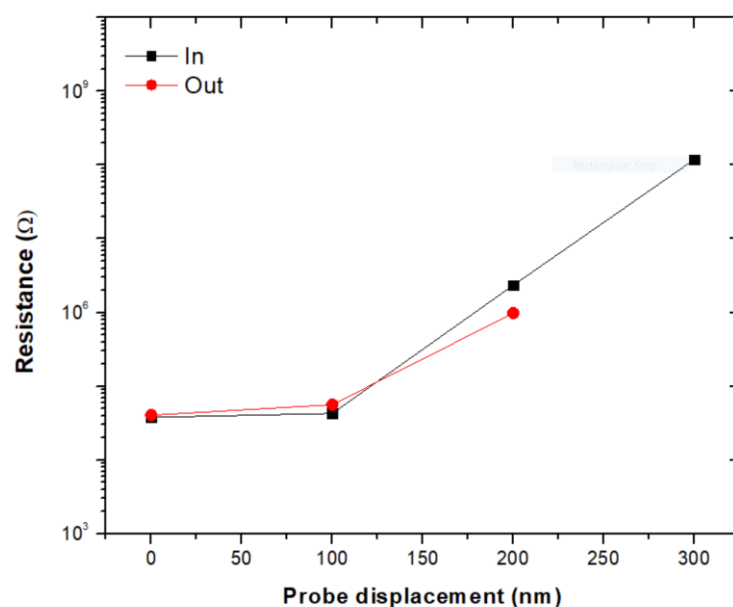

**Figure S1.** Graph of electrical resistance of a CNT fiber measured using 20  $\mu\text{m}$  probe separation against STM probe displacement: black squares show probe approach and red circles showing retraction.

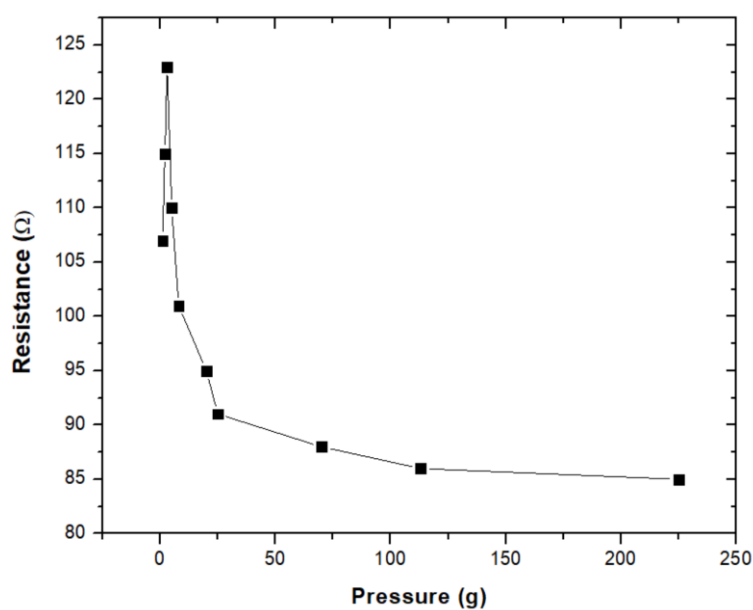

**Figure S2.** Graph of repeat resistance against pressure measured on the macro scale.
